# Supplementary material for: Effects of Tobacco Smoking on the Degeneration of the Intervertebral Disc: A Finite Element Study
Source: PubMed Central journal article supplement (PMC4547737; doi:10.1371/journal.pone.0136137), 2015-08-24
Supplement: pone.0136137.s001.pdf [file pone.0136137.s001.pdf]

| scenario               | GAG [ $\mu\text{g} / \text{mm}^3$ ] |          |         | Cell / $\text{mm}^3$ |         |         |
|------------------------|-------------------------------------|----------|---------|----------------------|---------|---------|
|                        | CEP                                 | AF       | NP      | CEP                  | AF      | NP      |
| non-smoker             | 81.81818                            | 75.75758 | 105     | 15000                | 9000    | 4000    |
| heavy smoker           | 53.77909                            | 60.59091 | 96.999  | 15000                | 9000    | 4000    |
| <b>ratio non-heavy</b> | 65.73%                              | 79.98%   | 92.38%  | 100.00%              | 100.00% | 100.00% |
| light smoker           | 74.55273                            | 74.34091 | 105     | 15000                | 9000    | 4000    |
| <b>ratio non-light</b> | 91.12%                              | 98.13%   | 100.00% | 100.00%              | 100.00% | 100.00% |
