# Supplementary material for: Effects of Tobacco Smoking on the Degeneration of the Intervertebral Disc: A Finite Element Study
Source: PubMed Central journal article supplement (PMC4547737; doi:10.1371/journal.pone.0136137), 2015-08-24
Supplement: pone.0136137.s002.pdf [file pone.0136137.s002.pdf]

| scenario               | GAG [ $\mu\text{g} / \text{mm}^3$ ] |          |        | Cell / $\text{mm}^3$ |        |        |
|------------------------|-------------------------------------|----------|--------|----------------------|--------|--------|
|                        | CEP                                 | AF       | NP     | CEP                  | AF     | NP     |
| non-smoker             | 81.81818                            | 75.75758 | 105    | 15000                | 9000   | 4000   |
| heavy smoker           | 81.81818                            | 59.72727 | 73.479 | 15000                | 7166.7 | 2848   |
| <b>ratio non-heavy</b> | 100.00%                             | 78.84%   | 69.98% | 100.00%              | 79.63% | 71.20% |
| light smoker           | 81.81818                            | 62.29545 | 74.991 | 15000                | 7360   | 2862   |
| <b>ratio non-light</b> | 100.00%                             | 82.23%   | 71.42% | 100.00%              | 81.78% | 71.55% |
