# Supplementary material for: Effects of Tobacco Smoking on the Degeneration of the Intervertebral Disc: A Finite Element Study
Source: PubMed Central journal article supplement (PMC4547737; doi:10.1371/journal.pone.0136137), 2015-08-24
Supplement: pone.0136137.s003.pdf [file pone.0136137.s003.pdf]

| scenario               | Glucose [mM] |          |          | Oxygen[kPa] |          |          |
|------------------------|--------------|----------|----------|-------------|----------|----------|
|                        | CEP          | AF       | NP       | CEP         | AF       | NP       |
| non-smoker             | 2.75E+00     | 1.31E+00 | 8.01E-01 | 3.17E+00    | 1.93E+00 | 5.40E-01 |
| heavy smoker           | 1.19E+00     | 7.40E-01 | 4.37E-01 | 7.79E-01    | 6.30E-01 | 2.54E-01 |
| <b>ratio non-heavy</b> | 43.26%       | 56.66%   | 54.63%   | 24.57%      | 32.64%   | 47.04%   |
| light smoker           | 1.96E+00     | 9.66E-01 | 6.18E-01 | 1.47E+00    | 9.90E-01 | 3.09E-01 |
| <b>ratio non-light</b> | 71.41%       | 73.97%   | 77.26%   | 46.37%      | 51.30%   | 57.22%   |

| scenario               | GAG [ug /mm^3] |          |         | Cell /mm^3 |        |        |
|------------------------|----------------|----------|---------|------------|--------|--------|
|                        | CEP            | AF       | NP      | CEP        | AF     | NP     |
| non-smoker             | 81.81818       | 75.75758 | 105     | 15000      | 9000   | 4000   |
| heavy smoker           | 31.01727       | 32.40909 | 69.0165 | 15000      | 5235.3 | 1730   |
| <b>ratio non-heavy</b> | 37.91%         | 42.78%   | 65.73%  | 100.00%    | 58.17% | 43.25% |
| light smoker           | 59.01545       | 60.84091 | 95.676  | 15000      | 7397.1 | 2889.6 |
| <b>ratio non-light</b> | 72.13%         | 80.31%   | 91.12%  | 100.00%    | 82.19% | 72.24% |
