# Supplementary material for: Effects of Tobacco Smoking on the Degeneration of the Intervertebral Disc: A Finite Element Study
Source: PubMed Central journal article supplement (PMC4547737; doi:10.1371/journal.pone.0136137), 2015-08-24
Supplement: pone.0136137.s004.pdf [file pone.0136137.s004.pdf]

Light Smoker

| day | GAG-CEP | GAG-AF | GAG-NP | Cell-CEP | Cell-AF | Cell-NP |
|-----|---------|--------|--------|----------|---------|---------|
| 0   | 93.7%   | 80.7%  | 72.1%  | 100.0%   | 82.2%   | 72.2%   |
| 1   | 100.0%  | 84.7%  | 72.1%  | 100.0%   | 84.2%   | 72.2%   |
| 2   | 100.0%  | 85.9%  | 72.2%  | 100.0%   | 85.4%   | 72.2%   |
| 3   | 100.0%  | 86.1%  | 72.2%  | 100.0%   | 85.6%   | 72.2%   |
| 4   | 100.0%  | 86.1%  | 72.3%  | 100.0%   | 85.6%   | 72.3%   |
| 5   | 100.0%  | 86.2%  | 72.5%  | 100.0%   | 85.7%   | 72.4%   |
| 6   | 100.0%  | 86.4%  | 72.7%  | 100.0%   | 85.8%   | 72.6%   |
| 7   | 100.0%  | 86.5%  | 72.9%  | 100.0%   | 86.0%   | 72.7%   |
| 8   | 100.0%  | 86.6%  | 73.0%  | 100.0%   | 86.0%   | 72.8%   |
| 9   | 100.0%  | 86.6%  | 73.1%  | 100.0%   | 86.1%   | 72.9%   |
| 10  | 100.0%  | 86.6%  | 73.2%  | 100.0%   | 86.1%   | 72.9%   |
| 11  | 100.0%  | 86.6%  | 73.2%  | 100.0%   | 86.1%   | 73.0%   |
| 12  | 100.0%  | 86.7%  | 73.3%  | 100.0%   | 86.1%   | 73.0%   |
| 13  | 100.0%  | 86.7%  | 73.3%  | 100.0%   | 86.2%   | 73.1%   |
| 14  | 100.0%  | 86.7%  | 73.3%  | 100.0%   | 86.2%   | 73.1%   |
| 15  | 100.0%  | 86.8%  | 73.4%  | 100.0%   | 86.2%   | 73.1%   |
| 16  | 100.0%  | 86.8%  | 73.4%  | 100.0%   | 86.2%   | 73.2%   |
| 17  | 100.0%  | 86.8%  | 73.4%  | 100.0%   | 86.2%   | 73.2%   |
| 18  | 100.0%  | 86.8%  | 73.5%  | 100.0%   | 86.2%   | 73.2%   |
| 19  | 100.0%  | 86.8%  | 73.5%  | 100.0%   | 86.3%   | 73.2%   |
| 20  | 100.0%  | 86.8%  | 73.5%  | 100.0%   | 86.3%   | 73.2%   |
| 21  | 100.0%  | 86.8%  | 73.5%  | 100.0%   | 86.3%   | 73.3%   |
| 22  | 100.0%  | 86.8%  | 73.5%  | 100.0%   | 86.3%   | 73.3%   |
| 23  | 100.0%  | 86.8%  | 73.6%  | 100.0%   | 86.3%   | 73.3%   |
| 24  | 100.0%  | 86.8%  | 73.6%  | 100.0%   | 86.3%   | 73.3%   |
| 25  | 100.0%  | 86.9%  | 73.6%  | 100.0%   | 86.3%   | 73.3%   |
| 26  | 100.0%  | 86.9%  | 73.6%  | 100.0%   | 86.3%   | 73.3%   |
| 27  | 100.0%  | 86.9%  | 73.6%  | 100.0%   | 86.3%   | 73.3%   |
| 28  | 100.0%  | 86.9%  | 73.6%  | 100.0%   | 86.3%   | 73.3%   |
| 29  | 100.0%  | 86.9%  | 73.6%  | 100.0%   | 86.3%   | 73.3%   |
| 30  | 100.0%  | 86.9%  | 73.6%  | 100.0%   | 86.3%   | 73.3%   |
| 31  | 100.0%  | 86.9%  | 73.6%  | 100.0%   | 86.3%   | 73.3%   |
| 32  | 100.0%  | 86.9%  | 73.6%  | 100.0%   | 86.3%   | 73.3%   |
| 33  | 100.0%  | 86.9%  | 73.6%  | 100.0%   | 86.3%   | 73.3%   |
| 34  | 100.0%  | 86.9%  | 73.6%  | 100.0%   | 86.3%   | 73.3%   |
| 35  | 100.0%  | 86.9%  | 73.6%  | 100.0%   | 86.3%   | 73.3%   |
| 36  | 100.0%  | 86.9%  | 73.6%  | 100.0%   | 86.3%   | 73.3%   |
| 37  | 100.0%  | 86.9%  | 73.6%  | 100.0%   | 86.3%   | 73.3%   |
| 38  | 100.0%  | 86.9%  | 73.6%  | 100.0%   | 86.3%   | 73.3%   |
| 39  | 100.0%  | 86.9%  | 73.6%  | 100.0%   | 86.4%   | 73.3%   |
| 40  | 100.0%  | 86.9%  | 73.6%  | 100.0%   | 86.4%   | 73.3%   |
| 41  | 100.0%  | 86.9%  | 73.6%  | 100.0%   | 86.4%   | 73.3%   |
| 42  | 100.0%  | 86.9%  | 73.6%  | 100.0%   | 86.4%   | 73.3%   |
| 43  | 100.0%  | 86.9%  | 73.6%  | 100.0%   | 86.4%   | 73.3%   |
| 44  | 100.0%  | 86.9%  | 73.6%  | 100.0%   | 86.4%   | 73.3%   |













|            |        |       |       |        |       |       |
|------------|--------|-------|-------|--------|-------|-------|
| <b>327</b> | 100.0% | 86.9% | 73.6% | 100.0% | 86.4% | 73.3% |
| <b>328</b> | 100.0% | 86.9% | 73.6% | 100.0% | 86.4% | 73.3% |
| <b>329</b> | 100.0% | 86.9% | 73.6% | 100.0% | 86.4% | 73.3% |
| <b>330</b> | 100.0% | 86.9% | 73.6% | 100.0% | 86.4% | 73.3% |
| <b>331</b> | 100.0% | 86.9% | 73.6% | 100.0% | 86.4% | 73.3% |
| <b>332</b> | 100.0% | 86.9% | 73.6% | 100.0% | 86.4% | 73.3% |
| <b>333</b> | 100.0% | 86.9% | 73.6% | 100.0% | 86.4% | 73.3% |
| <b>334</b> | 100.0% | 86.9% | 73.6% | 100.0% | 86.4% | 73.3% |
| <b>335</b> | 100.0% | 86.9% | 73.6% | 100.0% | 86.4% | 73.3% |
| <b>336</b> | 100.0% | 86.9% | 73.6% | 100.0% | 86.4% | 73.3% |
| <b>337</b> | 100.0% | 86.9% | 73.6% | 100.0% | 86.4% | 73.3% |
| <b>338</b> | 100.0% | 86.9% | 73.6% | 100.0% | 86.4% | 73.3% |
| <b>339</b> | 100.0% | 86.9% | 73.6% | 100.0% | 86.4% | 73.3% |
| <b>340</b> | 100.0% | 86.9% | 73.6% | 100.0% | 86.4% | 73.3% |
| <b>341</b> | 100.0% | 86.9% | 73.6% | 100.0% | 86.4% | 73.3% |
| <b>342</b> | 100.0% | 86.9% | 73.6% | 100.0% | 86.4% | 73.3% |
| <b>343</b> | 100.0% | 86.9% | 73.6% | 100.0% | 86.4% | 73.3% |
| <b>344</b> | 100.0% | 86.9% | 73.6% | 100.0% | 86.4% | 73.3% |
| <b>345</b> | 100.0% | 86.9% | 73.6% | 100.0% | 86.4% | 73.3% |
| <b>346</b> | 100.0% | 86.9% | 73.6% | 100.0% | 86.4% | 73.3% |
| <b>347</b> | 100.0% | 86.9% | 73.6% | 100.0% | 86.4% | 73.3% |
| <b>348</b> | 100.0% | 86.9% | 73.6% | 100.0% | 86.4% | 73.3% |
| <b>349</b> | 100.0% | 86.9% | 73.6% | 100.0% | 86.4% | 73.3% |
| <b>350</b> | 100.0% | 86.9% | 73.6% | 100.0% | 86.4% | 73.3% |
| <b>351</b> | 100.0% | 86.9% | 73.6% | 100.0% | 86.4% | 73.3% |
| <b>352</b> | 100.0% | 86.9% | 73.6% | 100.0% | 86.4% | 73.3% |
| <b>353</b> | 100.0% | 86.9% | 73.6% | 100.0% | 86.4% | 73.3% |
| <b>354</b> | 100.0% | 86.9% | 73.6% | 100.0% | 86.4% | 73.3% |
| <b>355</b> | 100.0% | 86.9% | 73.6% | 100.0% | 86.4% | 73.3% |
| <b>356</b> | 100.0% | 86.9% | 73.6% | 100.0% | 86.4% | 73.3% |
| <b>357</b> | 100.0% | 86.9% | 73.6% | 100.0% | 86.4% | 73.3% |
| <b>358</b> | 100.0% | 86.9% | 73.6% | 100.0% | 86.4% | 73.3% |
| <b>359</b> | 100.0% | 86.9% | 73.6% | 100.0% | 86.4% | 73.3% |
| <b>360</b> | 100.0% | 86.9% | 73.6% | 100.0% | 86.4% | 73.3% |
| <b>361</b> | 100.0% | 86.9% | 73.6% | 100.0% | 86.4% | 73.3% |
| <b>362</b> | 100.0% | 86.9% | 73.6% | 100.0% | 86.4% | 73.3% |
| <b>363</b> | 100.0% | 86.9% | 73.6% | 100.0% | 86.4% | 73.3% |
| <b>364</b> | 100.0% | 86.9% | 73.6% | 100.0% | 86.4% | 73.3% |

Heavy Smoker

| day      | GAG-CEP | GAG-AF | GAG-NP | Cell-CEP | Cell-AF | Cell-NP |
|----------|---------|--------|--------|----------|---------|---------|
| <b>0</b> | 69.4%   | 43.2%  | 37.9%  | 100.0%   | 58.2%   | 43.3%   |
| <b>1</b> | 100.0%  | 65.9%  | 44.2%  | 100.0%   | 65.8%   | 45.8%   |
| <b>2</b> | 100.0%  | 67.2%  | 45.0%  | 100.0%   | 67.1%   | 46.4%   |
| <b>3</b> | 100.0%  | 67.6%  | 46.0%  | 100.0%   | 67.5%   | 47.1%   |
| <b>4</b> | 100.0%  | 67.8%  | 47.1%  | 100.0%   | 67.7%   | 48.1%   |
| <b>5</b> | 100.0%  | 68.2%  | 48.1%  | 100.0%   | 68.1%   | 48.9%   |



|    |        |       |       |        |       |       |
|----|--------|-------|-------|--------|-------|-------|
| 6  | 100.0% | 68.5% | 49.0% | 100.0% | 68.3% | 49.8% |
| 7  | 100.0% | 68.5% | 49.8% | 100.0% | 68.4% | 50.5% |
| 8  | 100.0% | 68.6% | 50.6% | 100.0% | 68.5% | 51.2% |
| 9  | 100.0% | 68.8% | 51.1% | 100.0% | 68.7% | 51.7% |
| 10 | 100.0% | 69.0% | 51.6% | 100.0% | 68.9% | 52.1% |
| 11 | 100.0% | 69.1% | 51.9% | 100.0% | 69.0% | 52.4% |
| 12 | 100.0% | 69.1% | 52.2% | 100.0% | 69.0% | 52.7% |
| 13 | 100.0% | 69.1% | 52.4% | 100.0% | 69.0% | 52.9% |
| 14 | 100.0% | 69.2% | 52.6% | 100.0% | 69.1% | 53.1% |
| 15 | 100.0% | 69.2% | 52.7% | 100.0% | 69.1% | 53.2% |
| 16 | 100.0% | 69.2% | 52.9% | 100.0% | 69.1% | 53.4% |
| 17 | 100.0% | 69.2% | 53.0% | 100.0% | 69.1% | 53.5% |
| 18 | 100.0% | 69.2% | 53.1% | 100.0% | 69.1% | 53.6% |
| 19 | 100.0% | 69.2% | 53.2% | 100.0% | 69.1% | 53.7% |
| 20 | 100.0% | 69.2% | 53.3% | 100.0% | 69.1% | 53.8% |
| 21 | 100.0% | 69.2% | 53.5% | 100.0% | 69.1% | 53.9% |
| 22 | 100.0% | 69.2% | 53.5% | 100.0% | 69.1% | 54.0% |
| 23 | 100.0% | 69.2% | 53.6% | 100.0% | 69.1% | 54.0% |
| 24 | 100.0% | 69.2% | 53.6% | 100.0% | 69.1% | 54.1% |
| 25 | 100.0% | 69.2% | 53.6% | 100.0% | 69.1% | 54.1% |
| 26 | 100.0% | 69.2% | 53.7% | 100.0% | 69.1% | 54.1% |
| 27 | 100.0% | 69.2% | 53.7% | 100.0% | 69.1% | 54.1% |
| 28 | 100.0% | 69.3% | 53.7% | 100.0% | 69.1% | 54.2% |
| 29 | 100.0% | 69.3% | 53.7% | 100.0% | 69.2% | 54.2% |
| 30 | 100.0% | 69.3% | 53.7% | 100.0% | 69.2% | 54.2% |
| 31 | 100.0% | 69.3% | 53.7% | 100.0% | 69.2% | 54.2% |
| 32 | 100.0% | 69.3% | 53.8% | 100.0% | 69.2% | 54.2% |
| 33 | 100.0% | 69.3% | 53.8% | 100.0% | 69.2% | 54.2% |
| 34 | 100.0% | 69.3% | 53.8% | 100.0% | 69.2% | 54.2% |
| 35 | 100.0% | 69.3% | 53.8% | 100.0% | 69.2% | 54.2% |
| 36 | 100.0% | 69.3% | 53.8% | 100.0% | 69.2% | 54.2% |
| 37 | 100.0% | 69.3% | 53.8% | 100.0% | 69.2% | 54.2% |
| 38 | 100.0% | 69.3% | 53.8% | 100.0% | 69.2% | 54.2% |
| 39 | 100.0% | 69.3% | 53.8% | 100.0% | 69.2% | 54.2% |
| 40 | 100.0% | 69.3% | 53.8% | 100.0% | 69.2% | 54.2% |
| 41 | 100.0% | 69.3% | 53.8% | 100.0% | 69.2% | 54.2% |
| 42 | 100.0% | 69.3% | 53.8% | 100.0% | 69.2% | 54.2% |
| 43 | 100.0% | 69.3% | 53.8% | 100.0% | 69.2% | 54.2% |
| 44 | 100.0% | 69.3% | 53.8% | 100.0% | 69.2% | 54.2% |
| 45 | 100.0% | 69.3% | 53.8% | 100.0% | 69.2% | 54.2% |
| 46 | 100.0% | 69.3% | 53.8% | 100.0% | 69.2% | 54.2% |
| 47 | 100.0% | 69.3% | 53.8% | 100.0% | 69.2% | 54.2% |
| 48 | 100.0% | 69.3% | 53.8% | 100.0% | 69.2% | 54.2% |
| 49 | 100.0% | 69.3% | 53.8% | 100.0% | 69.2% | 54.2% |
| 50 | 100.0% | 69.3% | 53.8% | 100.0% | 69.2% | 54.2% |
| 51 | 100.0% | 69.3% | 53.8% | 100.0% | 69.2% | 54.2% |
| 52 | 100.0% | 69.3% | 53.8% | 100.0% | 69.2% | 54.2% |













|            |        |       |       |        |       |       |
|------------|--------|-------|-------|--------|-------|-------|
| <b>335</b> | 100.0% | 69.3% | 53.8% | 100.0% | 69.2% | 54.2% |
| <b>336</b> | 100.0% | 69.3% | 53.8% | 100.0% | 69.2% | 54.2% |
| <b>337</b> | 100.0% | 69.3% | 53.8% | 100.0% | 69.2% | 54.2% |
| <b>338</b> | 100.0% | 69.3% | 53.8% | 100.0% | 69.2% | 54.2% |
| <b>339</b> | 100.0% | 69.3% | 53.8% | 100.0% | 69.2% | 54.2% |
| <b>340</b> | 100.0% | 69.3% | 53.8% | 100.0% | 69.2% | 54.2% |
| <b>341</b> | 100.0% | 69.3% | 53.8% | 100.0% | 69.2% | 54.2% |
| <b>342</b> | 100.0% | 69.3% | 53.8% | 100.0% | 69.2% | 54.2% |
| <b>343</b> | 100.0% | 69.3% | 53.8% | 100.0% | 69.2% | 54.2% |
| <b>344</b> | 100.0% | 69.3% | 53.8% | 100.0% | 69.2% | 54.2% |
| <b>345</b> | 100.0% | 69.3% | 53.8% | 100.0% | 69.2% | 54.2% |
| <b>346</b> | 100.0% | 69.3% | 53.8% | 100.0% | 69.2% | 54.2% |
| <b>347</b> | 100.0% | 69.3% | 53.8% | 100.0% | 69.2% | 54.2% |
| <b>348</b> | 100.0% | 69.3% | 53.8% | 100.0% | 69.2% | 54.2% |
| <b>349</b> | 100.0% | 69.3% | 53.8% | 100.0% | 69.2% | 54.2% |
| <b>350</b> | 100.0% | 69.3% | 53.8% | 100.0% | 69.2% | 54.2% |
| <b>351</b> | 100.0% | 69.3% | 53.8% | 100.0% | 69.2% | 54.2% |
| <b>352</b> | 100.0% | 69.3% | 53.8% | 100.0% | 69.2% | 54.2% |
| <b>353</b> | 100.0% | 69.3% | 53.8% | 100.0% | 69.2% | 54.2% |
| <b>354</b> | 100.0% | 69.3% | 53.8% | 100.0% | 69.2% | 54.2% |
| <b>355</b> | 100.0% | 69.3% | 53.8% | 100.0% | 69.2% | 54.2% |
| <b>356</b> | 100.0% | 69.3% | 53.8% | 100.0% | 69.2% | 54.2% |
| <b>357</b> | 100.0% | 69.3% | 53.8% | 100.0% | 69.2% | 54.2% |
| <b>358</b> | 100.0% | 69.3% | 53.8% | 100.0% | 69.2% | 54.2% |
| <b>359</b> | 100.0% | 69.3% | 53.8% | 100.0% | 69.2% | 54.2% |
| <b>360</b> | 100.0% | 69.3% | 53.8% | 100.0% | 69.2% | 54.2% |
| <b>361</b> | 100.0% | 69.3% | 53.8% | 100.0% | 69.2% | 54.2% |
| <b>362</b> | 100.0% | 69.3% | 53.8% | 100.0% | 69.2% | 54.2% |
| <b>363</b> | 100.0% | 69.3% | 53.8% | 100.0% | 69.2% | 54.2% |
| <b>364</b> | 100.0% | 69.3% | 53.8% | 100.0% | 69.2% | 54.2% |
