# Supplementary material for: Effects of Tobacco Smoking on the Degeneration of the Intervertebral Disc: A Finite Element Study
Source: PubMed Central journal article supplement (PMC4547737; doi:10.1371/journal.pone.0136137), 2015-08-24
Supplement: pone.0136137.s005.pdf [file pone.0136137.s005.pdf]

| day | Cell  |        | Gag    |        |
|-----|-------|--------|--------|--------|
|     | heavy | light  | heavy  | light  |
| 0   | 91.9% | 111.0% | 72.7%  | 81.9%  |
| 1   | 99.9% | 120.5% | 101.1% | 121.8% |
| 2   | 92.3% | 115.6% | 93.5%  | 116.8% |
| 3   | 86.2% | 110.5% | 87.2%  | 111.6% |
| 4   | 81.1% | 105.3% | 82.0%  | 106.3% |
| 5   | 80.1% | 99.8%  | 81.1%  | 100.8% |
| 6   | 79.7% | 95.7%  | 80.6%  | 96.6%  |
| 7   | 79.5% | 95.3%  | 80.4%  | 96.1%  |
| 8   | 79.5% | 95.2%  | 80.4%  | 96.1%  |
| 9   | 79.3% | 94.9%  | 80.2%  | 95.8%  |
| 10  | 79.2% | 94.8%  | 80.2%  | 95.6%  |
| 11  | 79.2% | 94.6%  | 80.1%  | 95.5%  |
| 12  | 79.1% | 94.6%  | 80.1%  | 95.4%  |
| 13  | 79.0% | 94.6%  | 80.0%  | 95.4%  |
| 14  | 79.0% | 94.5%  | 79.9%  | 95.4%  |
| 15  | 79.0% | 94.4%  | 79.9%  | 95.3%  |
| 16  | 79.0% | 94.4%  | 79.9%  | 95.2%  |
| 17  | 79.0% | 94.4%  | 79.9%  | 95.2%  |
| 18  | 79.0% | 94.4%  | 79.9%  | 95.2%  |
| 19  | 79.0% | 94.4%  | 79.9%  | 95.2%  |
| 20  | 79.0% | 94.4%  | 79.9%  | 95.2%  |
| 21  | 79.0% | 94.3%  | 79.9%  | 95.2%  |
| 22  | 78.9% | 94.3%  | 79.8%  | 95.2%  |
| 23  | 78.9% | 94.3%  | 79.8%  | 95.2%  |
| 24  | 78.9% | 94.3%  | 79.8%  | 95.2%  |
| 25  | 78.9% | 94.3%  | 79.8%  | 95.2%  |
| 26  | 78.9% | 94.3%  | 79.8%  | 95.2%  |
| 27  | 78.9% | 94.3%  | 79.8%  | 95.2%  |
| 28  | 78.9% | 94.3%  | 79.8%  | 95.2%  |
| 29  | 78.9% | 94.3%  | 79.8%  | 95.2%  |
| 30  | 78.9% | 94.3%  | 79.8%  | 95.1%  |
| 31  | 78.9% | 94.3%  | 79.8%  | 95.1%  |
| 32  | 78.9% | 94.3%  | 79.8%  | 95.1%  |
| 33  | 78.9% | 94.3%  | 79.8%  | 95.1%  |
| 34  | 78.9% | 94.3%  | 79.8%  | 95.1%  |
| 35  | 78.9% | 94.3%  | 79.8%  | 95.1%  |
| 36  | 78.9% | 94.3%  | 79.8%  | 95.1%  |
| 37  | 78.9% | 94.3%  | 79.8%  | 95.1%  |
| 38  | 78.9% | 94.3%  | 79.8%  | 95.1%  |
| 39  | 78.9% | 94.3%  | 79.8%  | 95.1%  |
| 40  | 78.9% | 94.3%  | 79.8%  | 95.1%  |
| 41  | 78.9% | 94.3%  | 79.8%  | 95.1%  |
| 42  | 78.9% | 94.3%  | 79.8%  | 95.1%  |
| 43  | 78.9% | 94.3%  | 79.8%  | 95.1%  |
| 44  | 78.9% | 94.3%  | 79.8%  | 95.1%  |

|           |       |       |       |       |
|-----------|-------|-------|-------|-------|
| <b>45</b> | 78.9% | 94.3% | 79.8% | 95.1% |
| <b>46</b> | 78.9% | 94.3% | 79.8% | 95.1% |
| <b>47</b> | 78.9% | 94.3% | 79.8% | 95.1% |
| <b>48</b> | 78.9% | 94.3% | 79.8% | 95.1% |
| <b>49</b> | 78.9% | 94.3% | 79.7% | 95.1% |
| <b>50</b> | 78.9% | 94.3% | 79.7% | 95.1% |
| <b>51</b> | 78.9% | 94.3% | 79.7% | 95.1% |
| <b>52</b> | 78.9% | 94.3% | 79.7% | 95.1% |
| <b>53</b> | 78.9% | 94.3% | 79.7% | 95.1% |
| <b>54</b> | 78.9% | 94.3% | 79.7% | 95.1% |
| <b>55</b> | 78.9% | 94.3% | 79.7% | 95.1% |
| <b>56</b> | 78.9% | 94.3% | 79.7% | 95.1% |
| <b>57</b> | 78.9% | 94.3% | 79.7% | 95.1% |
| <b>58</b> | 78.9% | 94.3% | 79.7% | 95.1% |
| <b>59</b> | 79.0% | 94.3% | 79.7% | 95.1% |
| <b>60</b> | 79.0% | 94.3% | 79.7% | 95.1% |
| <b>61</b> | 79.0% | 94.3% | 79.7% | 95.1% |
| <b>62</b> | 79.0% | 94.3% | 79.7% | 95.1% |
| <b>63</b> | 79.0% | 94.3% | 79.7% | 95.1% |
| <b>64</b> | 79.0% | 94.3% | 79.7% | 95.1% |
| <b>65</b> | 79.0% | 94.3% | 79.7% | 95.1% |
| <b>66</b> | 79.0% | 94.3% | 79.7% | 95.1% |
| <b>67</b> | 79.0% | 94.3% | 79.7% | 95.1% |
| <b>68</b> | 79.0% | 94.3% | 79.7% | 95.1% |
| <b>69</b> | 79.0% | 94.3% | 79.7% | 95.1% |
| <b>70</b> | 79.0% | 94.3% | 79.7% | 95.1% |
| <b>71</b> | 79.0% | 94.3% | 79.7% | 95.1% |
| <b>72</b> | 79.0% | 94.3% | 79.7% | 95.1% |
| <b>73</b> | 79.0% | 94.3% | 79.7% | 95.1% |
| <b>74</b> | 79.0% | 94.3% | 79.7% | 95.0% |
| <b>75</b> | 79.0% | 94.3% | 79.7% | 95.0% |
| <b>76</b> | 79.0% | 94.3% | 79.7% | 95.0% |
| <b>77</b> | 79.0% | 94.3% | 79.7% | 95.0% |
| <b>78</b> | 79.0% | 94.3% | 79.7% | 95.0% |
| <b>79</b> | 79.0% | 94.3% | 79.7% | 95.0% |
| <b>80</b> | 79.0% | 94.3% | 79.7% | 95.0% |
| <b>81</b> | 79.0% | 94.3% | 79.7% | 95.0% |
| <b>82</b> | 79.0% | 94.3% | 79.7% | 95.0% |
| <b>83</b> | 79.0% | 94.3% | 79.7% | 95.0% |
| <b>84</b> | 79.0% | 94.3% | 79.7% | 95.0% |
| <b>85</b> | 79.0% | 94.3% | 79.7% | 95.0% |
| <b>86</b> | 79.0% | 94.3% | 79.7% | 95.0% |
| <b>87</b> | 79.0% | 94.3% | 79.7% | 95.0% |
| <b>88</b> | 79.0% | 94.3% | 79.7% | 95.0% |
| <b>89</b> | 79.0% | 94.3% | 79.7% | 95.0% |
| <b>90</b> | 79.0% | 94.3% | 79.7% | 95.0% |
| <b>91</b> | 79.0% | 94.3% | 79.7% | 95.0% |

|            |       |       |       |       |
|------------|-------|-------|-------|-------|
| <b>92</b>  | 79.0% | 94.3% | 79.7% | 95.0% |
| <b>93</b>  | 79.0% | 94.3% | 79.7% | 95.0% |
| <b>94</b>  | 79.0% | 94.3% | 79.7% | 95.0% |
| <b>95</b>  | 79.0% | 94.3% | 79.7% | 95.0% |
| <b>96</b>  | 79.0% | 94.3% | 79.7% | 95.0% |
| <b>97</b>  | 79.0% | 94.3% | 79.7% | 95.0% |
| <b>98</b>  | 79.0% | 94.3% | 79.7% | 95.0% |
| <b>99</b>  | 79.0% | 94.3% | 79.7% | 95.0% |
| <b>100</b> | 79.0% | 94.3% | 79.7% | 95.0% |
| <b>101</b> | 79.0% | 94.3% | 79.7% | 95.0% |
| <b>102</b> | 79.0% | 94.4% | 79.7% | 95.0% |
| <b>103</b> | 79.0% | 94.4% | 79.7% | 95.0% |
| <b>104</b> | 79.0% | 94.3% | 79.7% | 95.0% |
| <b>105</b> | 79.0% | 94.4% | 79.7% | 95.0% |
| <b>106</b> | 79.0% | 94.4% | 79.7% | 95.0% |
| <b>107</b> | 79.0% | 94.4% | 79.7% | 95.0% |
| <b>108</b> | 79.0% | 94.4% | 79.7% | 95.0% |
| <b>109</b> | 79.0% | 94.4% | 79.7% | 95.0% |
| <b>110</b> | 79.0% | 94.4% | 79.7% | 95.0% |
| <b>111</b> | 79.0% | 94.4% | 79.7% | 95.0% |
| <b>112</b> | 79.0% | 94.4% | 79.7% | 95.0% |
| <b>113</b> | 79.0% | 94.4% | 79.7% | 95.0% |
| <b>114</b> | 79.0% | 94.4% | 79.7% | 95.0% |
| <b>115</b> | 79.0% | 94.4% | 79.7% | 95.0% |
| <b>116</b> | 79.0% | 94.4% | 79.7% | 95.0% |
| <b>117</b> | 79.0% | 94.4% | 79.7% | 95.0% |
| <b>118</b> | 79.0% | 94.4% | 79.7% | 95.0% |
| <b>119</b> | 79.0% | 94.4% | 79.7% | 95.0% |
| <b>120</b> | 79.0% | 94.4% | 79.7% | 95.0% |
| <b>121</b> | 79.0% | 94.4% | 79.7% | 95.0% |
| <b>122</b> | 79.0% | 94.4% | 79.7% | 95.0% |
| <b>123</b> | 79.0% | 94.4% | 79.7% | 95.0% |
| <b>124</b> | 79.0% | 94.4% | 79.7% | 95.0% |
| <b>125</b> | 79.0% | 94.4% | 79.7% | 95.0% |
| <b>126</b> | 79.0% | 94.4% | 79.7% | 95.0% |
| <b>127</b> | 79.0% | 94.4% | 79.7% | 95.0% |
| <b>128</b> | 79.0% | 94.4% | 79.7% | 95.0% |
| <b>129</b> | 79.0% | 94.4% | 79.7% | 95.0% |
| <b>130</b> | 79.0% | 94.4% | 79.7% | 95.0% |
| <b>131</b> | 79.0% | 94.4% | 79.7% | 95.0% |
| <b>132</b> | 79.0% | 94.4% | 79.7% | 95.0% |
| <b>133</b> | 79.0% | 94.4% | 79.7% | 95.0% |
| <b>134</b> | 79.0% | 94.4% | 79.7% | 95.0% |
| <b>135</b> | 79.0% | 94.4% | 79.7% | 95.0% |
| <b>136</b> | 79.0% | 94.4% | 79.7% | 95.0% |
| <b>137</b> | 79.0% | 94.4% | 79.7% | 95.0% |
| <b>138</b> | 79.0% | 94.4% | 79.7% | 95.0% |

|            |       |       |       |       |
|------------|-------|-------|-------|-------|
| <b>139</b> | 79.0% | 94.4% | 79.7% | 95.0% |
| <b>140</b> | 79.0% | 94.4% | 79.7% | 95.0% |
| <b>141</b> | 79.0% | 94.4% | 79.7% | 95.0% |
| <b>142</b> | 79.0% | 94.4% | 79.7% | 95.0% |
| <b>143</b> | 79.0% | 94.4% | 79.7% | 95.0% |
| <b>144</b> | 79.0% | 94.4% | 79.7% | 95.0% |
| <b>145</b> | 79.0% | 94.4% | 79.7% | 95.0% |
| <b>146</b> | 79.0% | 94.4% | 79.7% | 95.0% |
| <b>147</b> | 79.0% | 94.4% | 79.7% | 95.0% |
| <b>148</b> | 79.0% | 94.4% | 79.7% | 95.0% |
| <b>149</b> | 79.0% | 94.4% | 79.7% | 95.0% |
| <b>150</b> | 79.0% | 94.4% | 79.7% | 95.0% |
| <b>151</b> | 79.0% | 94.4% | 79.7% | 95.0% |
| <b>152</b> | 79.0% | 94.4% | 79.7% | 95.0% |
| <b>153</b> | 79.0% | 94.4% | 79.7% | 95.0% |
| <b>154</b> | 79.0% | 94.4% | 79.7% | 95.0% |
| <b>155</b> | 79.0% | 94.4% | 79.7% | 95.0% |
| <b>156</b> | 79.0% | 94.4% | 79.7% | 95.0% |
| <b>157</b> | 79.0% | 94.4% | 79.7% | 95.0% |
| <b>158</b> | 79.0% | 94.4% | 79.7% | 95.0% |
| <b>159</b> | 79.0% | 94.4% | 79.7% | 95.0% |
| <b>160</b> | 79.0% | 94.4% | 79.7% | 95.0% |
| <b>161</b> | 79.0% | 94.4% | 79.7% | 95.0% |
| <b>162</b> | 79.0% | 94.4% | 79.7% | 95.0% |
| <b>163</b> | 79.0% | 94.4% | 79.7% | 95.0% |
| <b>164</b> | 79.0% | 94.4% | 79.7% | 95.0% |
| <b>165</b> | 79.0% | 94.4% | 79.7% | 95.0% |
| <b>166</b> | 79.0% | 94.4% | 79.7% | 95.0% |
| <b>167</b> | 79.0% | 94.4% | 79.7% | 95.0% |
| <b>168</b> | 79.0% | 94.4% | 79.7% | 95.0% |
| <b>169</b> | 79.0% | 94.4% | 79.7% | 95.0% |
| <b>170</b> | 79.0% | 94.4% | 79.7% | 95.0% |
| <b>171</b> | 79.0% | 94.4% | 79.7% | 95.0% |
| <b>172</b> | 79.0% | 94.4% | 79.7% | 95.0% |
| <b>173</b> | 79.0% | 94.4% | 79.7% | 95.0% |
| <b>174</b> | 79.0% | 94.4% | 79.7% | 95.0% |
| <b>175</b> | 79.0% | 94.4% | 79.7% | 95.0% |
| <b>176</b> | 79.0% | 94.4% | 79.7% | 95.0% |
| <b>177</b> | 79.0% | 94.4% | 79.7% | 95.0% |
| <b>178</b> | 79.0% | 94.4% | 79.7% | 95.0% |
| <b>179</b> | 79.0% | 94.4% | 79.7% | 95.0% |
| <b>180</b> | 79.0% | 94.4% | 79.7% | 95.0% |
| <b>181</b> | 79.0% | 94.4% | 79.7% | 95.0% |
| <b>182</b> | 79.0% | 94.4% | 79.7% | 95.0% |
| <b>183</b> | 79.0% | 94.4% | 79.7% | 95.0% |
| <b>184</b> | 79.0% | 94.4% | 79.7% | 95.0% |
| <b>185</b> | 79.0% | 94.4% | 79.7% | 95.0% |

|            |       |       |       |       |
|------------|-------|-------|-------|-------|
| <b>186</b> | 79.0% | 94.4% | 79.7% | 95.0% |
| <b>187</b> | 79.0% | 94.4% | 79.7% | 95.0% |
| <b>188</b> | 79.0% | 94.4% | 79.7% | 95.0% |
| <b>189</b> | 79.0% | 94.4% | 79.7% | 95.0% |
| <b>190</b> | 79.0% | 94.4% | 79.7% | 95.0% |
| <b>191</b> | 79.0% | 94.4% | 79.7% | 95.0% |
| <b>192</b> | 79.0% | 94.4% | 79.7% | 95.0% |
| <b>193</b> | 79.0% | 94.4% | 79.7% | 95.0% |
| <b>194</b> | 79.0% | 94.4% | 79.7% | 95.0% |
| <b>195</b> | 79.0% | 94.4% | 79.7% | 95.0% |
| <b>196</b> | 79.0% | 94.4% | 79.7% | 95.0% |
| <b>197</b> | 79.0% | 94.4% | 79.7% | 95.0% |
| <b>198</b> | 79.0% | 94.4% | 79.7% | 95.0% |
| <b>199</b> | 79.0% | 94.4% | 79.7% | 95.0% |
| <b>200</b> | 79.0% | 94.4% | 79.7% | 95.0% |
| <b>201</b> | 79.0% | 94.4% | 79.7% | 95.0% |
| <b>202</b> | 79.0% | 94.4% | 79.7% | 95.0% |
| <b>203</b> | 79.0% | 94.4% | 79.7% | 95.0% |
| <b>204</b> | 79.0% | 94.4% | 79.7% | 95.0% |
| <b>205</b> | 79.0% | 94.4% | 79.7% | 95.0% |
| <b>206</b> | 79.0% | 94.4% | 79.7% | 95.0% |
| <b>207</b> | 79.0% | 94.4% | 79.7% | 95.0% |
| <b>208</b> | 79.0% | 94.4% | 79.7% | 95.0% |
| <b>209</b> | 79.0% | 94.4% | 79.7% | 95.0% |
| <b>210</b> | 79.0% | 94.4% | 79.7% | 95.0% |
| <b>211</b> | 79.0% | 94.4% | 79.7% | 95.0% |
| <b>212</b> | 79.0% | 94.4% | 79.7% | 95.0% |
| <b>213</b> | 79.0% | 94.4% | 79.7% | 95.0% |
| <b>214</b> | 79.0% | 94.4% | 79.7% | 95.0% |
| <b>215</b> | 79.0% | 94.4% | 79.7% | 95.0% |
| <b>216</b> | 79.0% | 94.4% | 79.7% | 95.0% |
| <b>217</b> | 79.0% | 94.4% | 79.7% | 95.0% |
| <b>218</b> | 79.0% | 94.4% | 79.7% | 95.0% |
| <b>219</b> | 79.0% | 94.4% | 79.7% | 95.0% |
| <b>220</b> | 79.0% | 94.4% | 79.7% | 95.0% |
| <b>221</b> | 79.0% | 94.4% | 79.7% | 95.0% |
| <b>222</b> | 79.0% | 94.4% | 79.7% | 95.0% |
| <b>223</b> | 79.0% | 94.4% | 79.7% | 95.0% |
| <b>224</b> | 79.0% | 94.4% | 79.7% | 95.0% |
| <b>225</b> | 79.0% | 94.4% | 79.7% | 95.0% |
| <b>226</b> | 79.0% | 94.4% | 79.7% | 95.0% |
| <b>227</b> | 79.0% | 94.4% | 79.7% | 95.0% |
| <b>228</b> | 79.0% | 94.4% | 79.7% | 95.0% |
| <b>229</b> | 79.0% | 94.4% | 79.7% | 95.0% |
| <b>230</b> | 79.0% | 94.4% | 79.7% | 95.0% |
| <b>231</b> | 79.0% | 94.4% | 79.7% | 95.0% |
| <b>232</b> | 79.0% | 94.4% | 79.7% | 95.0% |

|            |       |       |       |       |
|------------|-------|-------|-------|-------|
| <b>233</b> | 79.0% | 94.4% | 79.7% | 95.0% |
| <b>234</b> | 79.0% | 94.4% | 79.7% | 95.0% |
| <b>235</b> | 79.0% | 94.4% | 79.7% | 95.0% |
| <b>236</b> | 79.0% | 94.4% | 79.7% | 95.0% |
| <b>237</b> | 79.0% | 94.4% | 79.7% | 95.0% |
| <b>238</b> | 79.0% | 94.4% | 79.7% | 95.0% |
| <b>239</b> | 79.0% | 94.4% | 79.7% | 95.0% |
| <b>240</b> | 79.0% | 94.4% | 79.7% | 95.0% |
| <b>241</b> | 79.0% | 94.4% | 79.7% | 95.0% |
| <b>242</b> | 79.0% | 94.4% | 79.7% | 95.0% |
| <b>243</b> | 79.0% | 94.4% | 79.7% | 95.0% |
| <b>244</b> | 79.0% | 94.4% | 79.7% | 95.0% |
| <b>245</b> | 79.0% | 94.4% | 79.7% | 95.0% |
| <b>246</b> | 79.0% | 94.4% | 79.7% | 95.0% |
| <b>247</b> | 79.0% | 94.4% | 79.7% | 95.0% |
| <b>248</b> | 79.0% | 94.4% | 79.7% | 95.0% |
| <b>249</b> | 79.0% | 94.4% | 79.7% | 95.0% |
| <b>250</b> | 79.0% | 94.4% | 79.7% | 95.0% |
| <b>251</b> | 79.0% | 94.4% | 79.7% | 95.0% |
| <b>252</b> | 79.0% | 94.4% | 79.7% | 95.0% |
| <b>253</b> | 79.0% | 94.4% | 79.7% | 95.0% |
| <b>254</b> | 79.0% | 94.4% | 79.7% | 95.0% |
| <b>255</b> | 79.0% | 94.4% | 79.7% | 95.0% |
| <b>256</b> | 79.0% | 94.4% | 79.7% | 95.0% |
| <b>257</b> | 79.0% | 94.4% | 79.7% | 95.0% |
| <b>258</b> | 79.0% | 94.4% | 79.7% | 95.0% |
| <b>259</b> | 79.0% | 94.4% | 79.7% | 95.0% |
| <b>260</b> | 79.0% | 94.4% | 79.7% | 95.0% |
| <b>261</b> | 79.0% | 94.4% | 79.7% | 95.0% |
| <b>262</b> | 79.0% | 94.4% | 79.7% | 95.0% |
| <b>263</b> | 79.0% | 94.4% | 79.7% | 95.0% |
| <b>264</b> | 79.0% | 94.4% | 79.7% | 95.0% |
| <b>265</b> | 79.0% | 94.4% | 79.7% | 95.0% |
| <b>266</b> | 79.0% | 94.4% | 79.7% | 95.0% |
| <b>267</b> | 79.0% | 94.4% | 79.7% | 95.0% |
| <b>268</b> | 79.0% | 94.4% | 79.7% | 95.0% |
| <b>269</b> | 79.0% | 94.4% | 79.7% | 95.0% |
| <b>270</b> | 79.0% | 94.4% | 79.7% | 95.0% |
| <b>271</b> | 79.0% | 94.4% | 79.7% | 95.0% |
| <b>272</b> | 79.0% | 94.4% | 79.7% | 95.0% |
| <b>273</b> | 79.0% | 94.4% | 79.7% | 95.0% |
| <b>274</b> | 79.0% | 94.4% | 79.7% | 95.0% |
| <b>275</b> | 79.0% | 94.4% | 79.7% | 95.0% |
| <b>276</b> | 79.0% | 94.4% | 79.7% | 95.0% |
| <b>277</b> | 79.0% | 94.4% | 79.7% | 95.0% |
| <b>278</b> | 79.0% | 94.4% | 79.7% | 95.0% |
| <b>279</b> | 79.0% | 94.4% | 79.7% | 95.0% |

|            |       |       |       |       |
|------------|-------|-------|-------|-------|
| <b>280</b> | 79.0% | 94.4% | 79.7% | 95.0% |
| <b>281</b> | 79.0% | 94.4% | 79.7% | 95.0% |
| <b>282</b> | 79.0% | 94.4% | 79.7% | 95.0% |
| <b>283</b> | 79.0% | 94.4% | 79.7% | 95.0% |
| <b>284</b> | 79.0% | 94.4% | 79.7% | 95.0% |
| <b>285</b> | 79.0% | 94.4% | 79.7% | 95.0% |
| <b>286</b> | 79.0% | 94.4% | 79.7% | 95.0% |
| <b>287</b> | 79.0% | 94.4% | 79.7% | 95.0% |
| <b>288</b> | 79.0% | 94.4% | 79.7% | 95.0% |
| <b>289</b> | 79.0% | 94.4% | 79.7% | 95.0% |
| <b>290</b> | 79.0% | 94.4% | 79.7% | 95.0% |
| <b>291</b> | 79.0% | 94.4% | 79.7% | 95.0% |
| <b>292</b> | 79.0% | 94.4% | 79.7% | 95.0% |
| <b>293</b> | 79.0% | 94.4% | 79.7% | 95.0% |
| <b>294</b> | 79.0% | 94.4% | 79.7% | 95.0% |
| <b>295</b> | 79.0% | 94.4% | 79.7% | 95.0% |
| <b>296</b> | 79.0% | 94.4% | 79.7% | 95.0% |
| <b>297</b> | 79.0% | 94.4% | 79.7% | 95.0% |
| <b>298</b> | 79.0% | 94.4% | 79.7% | 95.0% |
| <b>299</b> | 79.0% | 94.4% | 79.7% | 95.0% |
| <b>300</b> | 79.0% | 94.4% | 79.7% | 95.0% |
| <b>301</b> | 79.0% | 94.4% | 79.7% | 95.0% |
| <b>302</b> | 79.0% | 94.4% | 79.7% | 95.0% |
| <b>303</b> | 79.0% | 94.4% | 79.7% | 95.0% |
| <b>304</b> | 79.0% | 94.4% | 79.7% | 95.0% |
| <b>305</b> | 79.0% | 94.4% | 79.7% | 95.0% |
| <b>306</b> | 79.0% | 94.4% | 79.7% | 95.0% |
| <b>307</b> | 79.0% | 94.4% | 79.7% | 95.0% |
| <b>308</b> | 79.0% | 94.4% | 79.7% | 95.0% |
| <b>309</b> | 79.0% | 94.4% | 79.7% | 95.0% |
| <b>310</b> | 79.0% | 94.4% | 79.7% | 95.0% |
| <b>311</b> | 79.0% | 94.4% | 79.7% | 95.0% |
| <b>312</b> | 79.0% | 94.4% | 79.7% | 95.0% |
| <b>313</b> | 79.0% | 94.4% | 79.7% | 95.0% |
| <b>314</b> | 79.0% | 94.4% | 79.7% | 95.0% |
| <b>315</b> | 79.0% | 94.4% | 79.7% | 95.0% |
| <b>316</b> | 79.0% | 94.4% | 79.7% | 95.0% |
| <b>317</b> | 79.0% | 94.4% | 79.7% | 95.0% |
| <b>318</b> | 79.0% | 94.4% | 79.7% | 95.0% |
| <b>319</b> | 79.0% | 94.4% | 79.7% | 95.0% |
| <b>320</b> | 79.0% | 94.4% | 79.7% | 95.0% |
| <b>321</b> | 79.0% | 94.4% | 79.7% | 95.0% |
| <b>322</b> | 79.0% | 94.4% | 79.7% | 95.0% |
| <b>323</b> | 79.0% | 94.4% | 79.7% | 95.0% |
| <b>324</b> | 79.0% | 94.4% | 79.7% | 95.0% |
| <b>325</b> | 79.0% | 94.4% | 79.7% | 95.0% |
| <b>326</b> | 79.0% | 94.4% | 79.7% | 95.0% |

|            |       |       |       |       |
|------------|-------|-------|-------|-------|
| <b>327</b> | 79.0% | 94.4% | 79.7% | 95.0% |
| <b>328</b> | 79.0% | 94.4% | 79.7% | 95.0% |
| <b>329</b> | 79.0% | 94.4% | 79.7% | 95.0% |
| <b>330</b> | 79.0% | 94.4% | 79.7% | 95.0% |
| <b>331</b> | 79.0% | 94.4% | 79.7% | 95.0% |
| <b>332</b> | 79.0% | 94.4% | 79.7% | 95.0% |
| <b>333</b> | 79.0% | 94.4% | 79.7% | 95.0% |
| <b>334</b> | 79.0% | 94.4% | 79.7% | 95.0% |
| <b>335</b> | 79.0% | 94.4% | 79.7% | 95.0% |
| <b>336</b> | 79.0% | 94.4% | 79.7% | 95.0% |
| <b>337</b> | 79.0% | 94.4% | 79.7% | 95.0% |
| <b>338</b> | 79.0% | 94.4% | 79.7% | 95.0% |
| <b>339</b> | 79.0% | 94.4% | 79.7% | 95.0% |
| <b>340</b> | 79.0% | 94.4% | 79.7% | 95.0% |
| <b>341</b> | 79.0% | 94.4% | 79.7% | 95.0% |
| <b>342</b> | 79.0% | 94.4% | 79.7% | 95.0% |
| <b>343</b> | 79.0% | 94.4% | 79.7% | 95.0% |
| <b>344</b> | 79.0% | 94.4% | 79.7% | 95.0% |
| <b>345</b> | 79.0% | 94.4% | 79.7% | 95.0% |
| <b>346</b> | 79.0% | 94.4% | 79.7% | 95.0% |
| <b>347</b> | 79.0% | 94.4% | 79.7% | 95.0% |
| <b>348</b> | 79.0% | 94.4% | 79.7% | 95.0% |
| <b>349</b> | 79.0% | 94.4% | 79.7% | 95.0% |
| <b>350</b> | 79.0% | 94.4% | 79.7% | 95.0% |
| <b>351</b> | 79.0% | 94.4% | 79.7% | 95.0% |
| <b>352</b> | 79.0% | 94.4% | 79.7% | 95.0% |
| <b>353</b> | 79.0% | 94.4% | 79.7% | 95.0% |
| <b>354</b> | 79.0% | 94.4% | 79.7% | 95.0% |
| <b>355</b> | 79.0% | 94.4% | 79.7% | 95.0% |
| <b>356</b> | 79.0% | 94.4% | 79.7% | 95.0% |
| <b>357</b> | 79.0% | 94.4% | 79.7% | 95.0% |
| <b>358</b> | 79.0% | 94.4% | 79.7% | 95.0% |
| <b>359</b> | 79.0% | 94.4% | 79.7% | 95.0% |
| <b>360</b> | 79.0% | 94.4% | 79.7% | 95.0% |
| <b>361</b> | 79.0% | 94.4% | 79.7% | 95.0% |
| <b>362</b> | 79.0% | 94.4% | 79.7% | 95.0% |
| <b>363</b> | 79.0% | 94.4% | 79.7% | 95.0% |
| <b>364</b> | 79.0% | 94.4% | 79.7% | 95.0% |
